# Supplementary material for: Modelling Potential Distribution of Snow Leopards in Pamir, Northern Pakistan: Implications for Human–Snow Leopard Conflicts
Source: MDPI journal article supplement (doi:10.3390/su132313229), 2021-11-29
Supplement: s1 [file s1]

Archive with 2 entries (2 files):
- Figures sustainability-1447571 corrected.pdf
- Supplementary sustainability-1447571 corrected.pdf
