# Supplementary material for: Modelling Potential Distribution of Snow Leopards in Pamir, Northern Pakistan: Implications for Human–Snow Leopard Conflicts
Source: MDPI journal article supplement (doi:10.3390/su132313229), 2021-11-29
Supplement: s1 [file s1]

Supplementary Table S1: Analysis of correlation coefficient of the environmental variables

| Layer | bio2             | bio4            | bio6            | bio7      | bio8      | bio9             | bio10            | bio11            | bio13           | bio15            | bio16           | bio17           | bio18    | bio19 | slope |
|-------|------------------|-----------------|-----------------|-----------|-----------|------------------|------------------|------------------|-----------------|------------------|-----------------|-----------------|----------|-------|-------|
| bio2  | 1                |                 |                 |           |           |                  |                  |                  |                 |                  |                 |                 |          |       |       |
| bio4  | 0.128            | 1               |                 |           |           |                  |                  |                  |                 |                  |                 |                 |          |       |       |
| bio6  | <b>0.711 **</b>  | -0.518 **       | 1               |           |           |                  |                  |                  |                 |                  |                 |                 |          |       |       |
| bio7  | 0.512 **         | <b>0.896 **</b> | -0.176          | 1         |           |                  |                  |                  |                 |                  |                 |                 |          |       |       |
| bio8  | 0.206            | -0.061          | 0.126           | 0.053     | 1         |                  |                  |                  |                 |                  |                 |                 |          |       |       |
| bio9  | <b>0.959 **</b>  | 0.028           | <b>0.819 **</b> | 0.389 **  | 0.153     | 1                |                  |                  |                 |                  |                 |                 |          |       |       |
| bio10 | <b>0.926 **</b>  | -0.045          | <b>0.870 **</b> | 0.328 *   | 0.127     | <b>0.971 **</b>  | 1                |                  |                 |                  |                 |                 |          |       |       |
| bio11 | <b>0.830 **</b>  | -0.350 **       | <b>0.977 **</b> | 0.028     | 0.150     | <b>0.906 **</b>  | <b>0.951 **</b>  | 1                |                 |                  |                 |                 |          |       |       |
| bio13 | -0.479 **        | -0.313 *        | -0.100          | -0.382 ** | -0.225    | -0.427 **        | -0.262 *         | -0.166           | 1               |                  |                 |                 |          |       |       |
| bio15 | 0.547 **         | 0.242           | 0.237           | 0.449 **  | 0.595 **  | 0.438 **         | 0.443 **         | 0.344 **         | -0.212          | 1                |                 |                 |          |       |       |
| bio16 | -0.647 **        | -0.425 **       | -0.196          | -0.549 ** | -0.277 *  | -0.587 **        | -0.442 **        | -0.299 *         | <b>0.935 **</b> | -0.477 **        | 1               |                 |          |       |       |
| bio17 | <b>-0.846 **</b> | -0.277 *        | -0.463 **       | -0.533 ** | -0.353 ** | <b>-0.789 **</b> | -0.692 **        | -0.575 **        | 0.781 **        | -0.671 **        | <b>0.916 **</b> | 1               |          |       |       |
| bio18 | <b>-0.905 **</b> | -0.145          | -0.672 **       | -0.445 ** | -0.077    | <b>-0.934 **</b> | <b>-0.852 **</b> | <b>-0.763 **</b> | <b>0.672 **</b> | -0.296 *         | <b>0.754 **</b> | <b>0.840 **</b> | 1        |       |       |
| bio19 | <b>-0.717 **</b> | -0.276 *        | -0.371 **       | -0.513 ** | -0.453 ** | -0.631 **        | -0.612 **        | -0.496 **        | 0.472 **        | <b>-0.843 **</b> | 0.693 **        | <b>0.826 **</b> | 0.585 ** | 1     |       |
| slope | -0.240           | 0.129           | -0.373 **       | -0.037    | -0.206    | -0.273 *         | -0.375 **        | -0.388 **        | -0.105          | -0.238           | -0.035          | 0.123           | 0.188    | 0.209 | 1     |

\*\* . Correlation is significant at the 0.01 level (2-tailed).

\* . Correlation is significant at the 0.05 level (2-tailed).

The above table is the correlation coefficient among the explanatory variables. The environmental variables that have correlation coefficient of 0.70. This is the simple rule to detect the multicollinearity among the explanatory variables.

**Supplementary Table S2. Snow leopard presence points obtained from the study area**

| S.No. | Species        | Latitude | Longitude | Camera trapping Station                          |
|-------|----------------|----------|-----------|--------------------------------------------------|
| 1     | Panthera Uncia | 36.52835 | 74.58094  |                                                  |
| 2     | Panthera Uncia | 36.52693 | 74.58315  |                                                  |
| 3     | Panthera Uncia | 36.52693 | 74.58315  |                                                  |
| 4     | Panthera Uncia | 36.52693 | 74.58315  |                                                  |
| 5     | Panthera Uncia | 36.51511 | 75.02349  |                                                  |
| 6     | Panthera Uncia | 36.51511 | 75.02349  |                                                  |
| 7     | Panthera Uncia | 36.51608 | 75.02131  |                                                  |
| 8     | Panthera Uncia | 36.52302 | 75.02203  | Camera trapping of Snow leopard at this location |
| 9     | Panthera Uncia | 36.52635 | 75.02161  |                                                  |
| 10    | Panthera Uncia | 36.51698 | 75.04869  | Camera trapping of Snow leopard at this location |
| 11    | Panthera Uncia | 36.51622 | 75.05169  |                                                  |
| 12    | Panthera Uncia | 36.52874 | 75.10014  |                                                  |
| 13    | Panthera Uncia | 36.52983 | 75.10103  |                                                  |
| 14    | Panthera Uncia | 36.53253 | 75.10299  |                                                  |
| 15    | Panthera Uncia | 36.52049 | 75.08081  |                                                  |
| 16    | Panthera Uncia | 36.52043 | 75.08085  |                                                  |
| 17    | Panthera Uncia | 36.52043 | 75.08085  |                                                  |
| 18    | Panthera Uncia | 36.52043 | 75.08085  |                                                  |
| 19    | Panthera Uncia | 36.43934 | 75.1998   |                                                  |
| 20    | Panthera Uncia | 36.43934 | 75.1998   |                                                  |
| 21    | Panthera Uncia | 36.43935 | 75.19975  |                                                  |
| 22    | Panthera Uncia | 36.43935 | 75.19975  |                                                  |
| 23    | Panthera Uncia | 36.43624 | 75.19845  |                                                  |
| 24    | Panthera Uncia | 36.43624 | 75.19845  |                                                  |
| 25    | Panthera Uncia | 36.5041  | 75.14225  |                                                  |
| 26    | Panthera Uncia | 36.5041  | 75.14225  |                                                  |
| 27    | Panthera Uncia | 36.49834 | 75.17453  |                                                  |
| 28    | Panthera Uncia | 36.49834 | 75.17453  |                                                  |
| 29    | Panthera Uncia | 36.51131 | 75.11944  |                                                  |
| 30    | Panthera Uncia | 36.51096 | 75.12163  |                                                  |
| 31    | Panthera Uncia | 36.51141 | 75.12003  |                                                  |
| 32    | Panthera Uncia | 36.51141 | 75.12003  |                                                  |
| 33    | Panthera Uncia | 36.53319 | 75.10566  |                                                  |

|    |                |          |          |                                                  |
|----|----------------|----------|----------|--------------------------------------------------|
| 34 | Panthera Uncia | 36.53319 | 75.10566 |                                                  |
| 35 | Panthera Uncia | 36.53381 | 75.10622 |                                                  |
| 36 | Panthera Uncia | 36.52764 | 75.02114 | Camera trapping of Snow leopard at this location |
| 37 | Panthera Uncia | 36.51741 | 75.01823 |                                                  |
| 38 | Panthera Uncia | 36.51741 | 75.01823 |                                                  |
| 39 | Panthera Uncia | 36.52891 | 75.10035 |                                                  |
| 40 | Panthera Uncia | 36.53319 | 75.10566 |                                                  |
| 41 | Panthera Uncia | 36.50415 | 75.14492 |                                                  |
| 42 | Panthera Uncia | 36.52043 | 75.08086 |                                                  |
| 43 | Panthera Uncia | 36.52043 | 75.08086 |                                                  |
| 44 | Panthera Uncia | 36.52718 | 75.09902 |                                                  |
| 45 | Panthera Uncia | 36.52718 | 75.09902 |                                                  |
| 46 | Panthera Uncia | 36.50415 | 75.14492 |                                                  |
| 47 | Panthera Uncia | 36.2455  | 75.22906 |                                                  |
| 48 | Panthera Uncia | 36.2455  | 75.22906 |                                                  |
| 49 | Panthera Uncia | 36.23777 | 75.23256 |                                                  |
| 50 | Panthera Uncia | 36.22631 | 75.23032 |                                                  |
| 51 | Panthera Uncia | 36.22631 | 75.23032 |                                                  |
| 52 | Panthera Uncia | 36.22631 | 75.23032 |                                                  |
| 53 | Panthera Uncia | 36.22434 | 75.22904 |                                                  |
| 54 | Panthera Uncia | 36.22434 | 75.22904 |                                                  |
| 55 | Panthera Uncia | 36.22284 | 75.22794 |                                                  |
| 56 | Panthera Uncia | 36.22284 | 75.22794 |                                                  |
| 57 | Panthera Uncia | 36.21754 | 75.21497 |                                                  |
| 58 | Panthera Uncia | 36.2162  | 75.22444 |                                                  |
| 59 | Panthera Uncia | 36.22634 | 75.23519 |                                                  |
| 60 | Panthera Uncia | 36.22634 | 75.23519 |                                                  |
| 61 | Panthera Uncia | 36.22748 | 75.23751 |                                                  |
| 62 | Panthera Uncia | 36.22748 | 75.23751 |                                                  |
| 63 | Panthera Uncia | 36.22712 | 75.23806 |                                                  |
| 64 | Panthera Uncia | 36.22712 | 75.23806 |                                                  |
| 65 | Panthera Uncia | 36.25777 | 75.24087 |                                                  |
| 66 | Panthera Uncia | 36.2625  | 75.24148 |                                                  |
| 67 | Panthera Uncia | 36.2625  | 75.24148 |                                                  |
| 68 | Panthera Uncia | 36.26426 | 75.24216 |                                                  |
| 69 | Panthera Uncia | 36.26912 | 75.24251 |                                                  |
| 70 | Panthera Uncia | 36.26875 | 75.24656 |                                                  |
| 71 | Panthera Uncia | 36.27321 | 75.26098 |                                                  |
| 72 | Panthera Uncia | 36.27321 | 75.26098 |                                                  |
| 73 | Panthera Uncia | 36.28245 | 75.28762 |                                                  |
| 74 | Panthera Uncia | 36.28219 | 75.29662 |                                                  |

|    |                |          |          |  |
|----|----------------|----------|----------|--|
| 75 | Panthera Uncia | 36.28219 | 75.29662 |  |
| 76 | Panthera Uncia | 36.28164 | 75.30106 |  |
| 77 | Panthera Uncia | 36.28021 | 75.31972 |  |
| 78 | Panthera Uncia | 36.27548 | 75.26407 |  |
| 79 | Panthera Uncia | 36.26927 | 75.211   |  |
| 80 | Panthera Uncia | 36.26927 | 75.211   |  |
| 81 | Panthera Uncia | 36.27516 | 75.21244 |  |
| 82 | Panthera Uncia | 36.27179 | 75.21108 |  |
| 83 | Panthera Uncia | 36.26018 | 75.18954 |  |
| 84 | Panthera Uncia | 36.29171 | 75.12423 |  |
| 85 | Panthera Uncia | 36.29226 | 75.11894 |  |
